# Supplementary material for: Double-shelled hollow carbon nanospheres as enclosed electrochemical reactors to enhance the lithium storage performance of silicon nanodots
Source: Royal Society of Chemistry journal article supplement (doi:10.1039/d0ta04323k), 2020-01-01
Supplement: d0ta04323k1.pdf [file d0ta04323k1.pdf]

Electronic Supplementary Material (ESI) for Journal of Materials Chemistry A.  
This journal is © The Royal Society of Chemistry 2020

## Supplementary Information for

### **Double-Shelled Hollow Carbon Nanospheres as an Enclosed Electrochemical Reactor to Enhance the Lithium Storage Performance of Silicon Nanodots**

*Ruiyu Zhu,<sup>a,c</sup> Xuejiao Hu,<sup>a</sup> Kai Chen,<sup>b</sup> Jie Dang,<sup>a</sup> Xiujuan Wang,<sup>a</sup> Xiaojie Liu,<sup>\*,a,c</sup> and Hui Wang<sup>\*,a,c</sup>*

- a. Key Laboratory of Synthetic and Natural Functional Molecule of the Ministry of Education, College of Chemistry & Materials science, Northwest University, Xi'an 710127, PR China.
  - b. Department of Materials Science & Engineering, Pusan National University, Busan, 46241, Korea.
  - c. Shaanxi Joint Lab of Graphene (NWU), Xi'an 710127, PR China.
- E-mail: [huiwang@nwu.edu.cn](mailto:huiwang@nwu.edu.cn) (H.Wang), [xiaojie.liu@nwu.edu.cn](mailto:xiaojie.liu@nwu.edu.cn) (X. J. Liu)

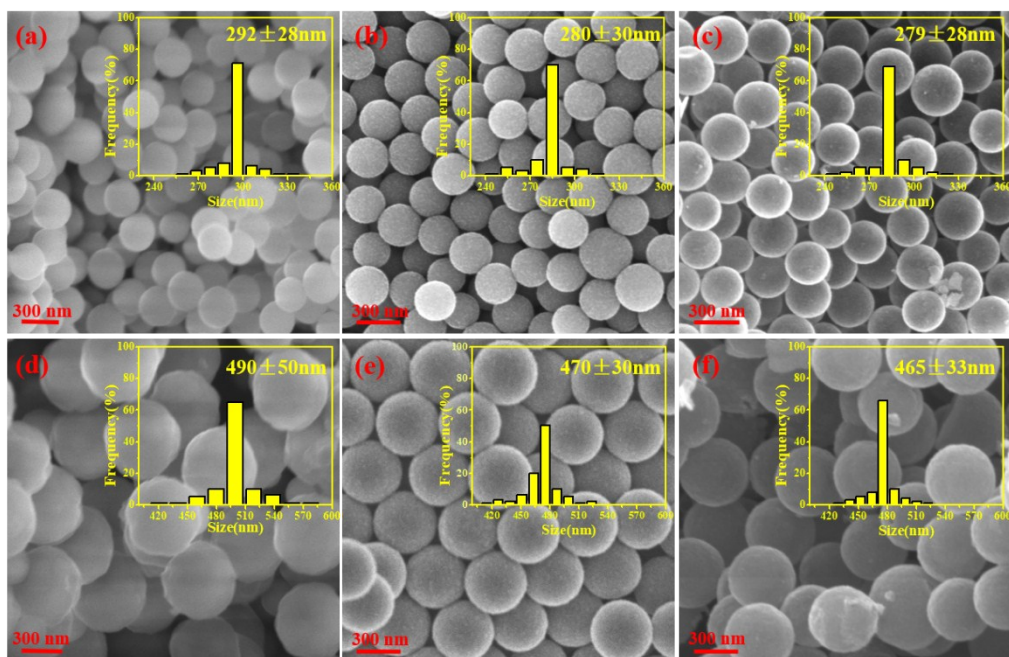

**Figure S1.** SEM images and particle size distributions of (a)  $\text{SiO}_2@\text{SiO}_2/\text{RF}$ , (b)  $\text{SiO}_2@\text{SiO}_2/\text{C}$ , (c)  $\text{SiNDs}@\text{SSHHC}$ , (d)  $\text{SiO}_2@\text{SiO}_2/\text{RF}@\text{SiO}_2@\text{SiO}_2/\text{RF}$ , (e)  $\text{SiO}_2@\text{SiO}_2/\text{C}@\text{SiO}_2@\text{SiO}_2/\text{C}$  and (f)  $\text{SiNDs}@\text{DSHC}$ .

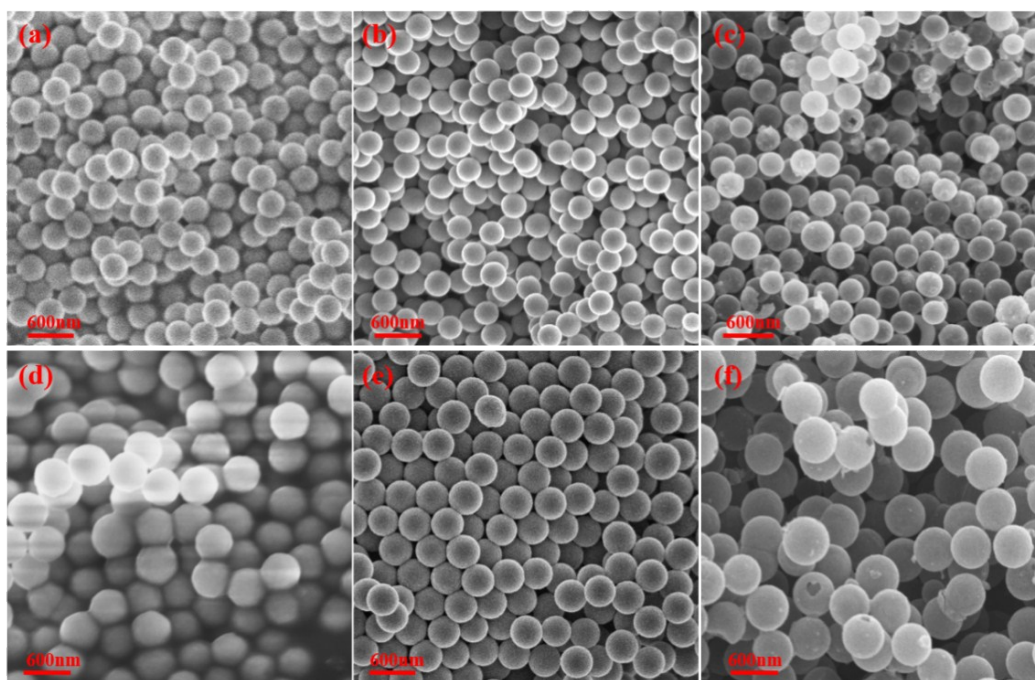

**Figure S2.** SEM images with low magnifications of (a)  $\text{SiO}_2@\text{SiO}_2/\text{RF}$ , (b)  $\text{SiO}_2@\text{SiO}_2/\text{C}$ , (c)  $\text{SiNDs}@SSHC$ , (d)  $\text{SiO}_2@\text{SiO}_2/\text{RF}@SiO_2@SiO_2/\text{RF}$ , (e)  $\text{SiO}_2@\text{SiO}_2/\text{C}@SiO_2@SiO_2/\text{C}$  and (f)  $\text{SiNDs}@DSHC$ .

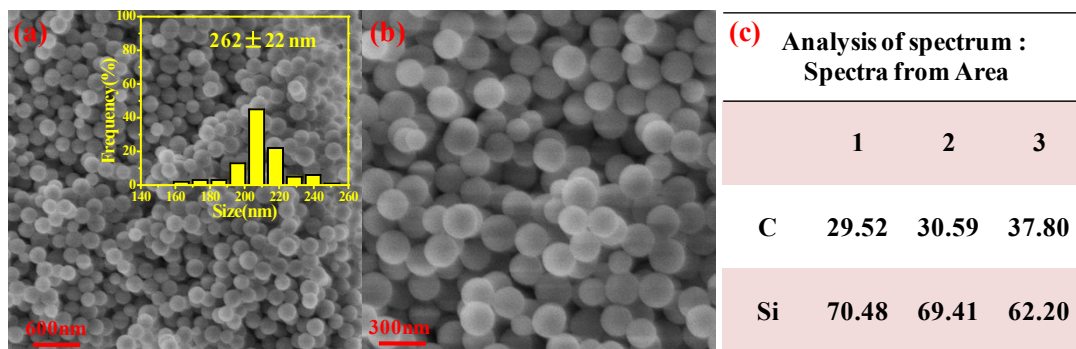

**Figure S3.** (a and b) SEM low and high magnification images of SiO<sub>2</sub> stirred for 15min. (c) The element distributions of C and Si in different regions in Figure 2(g).

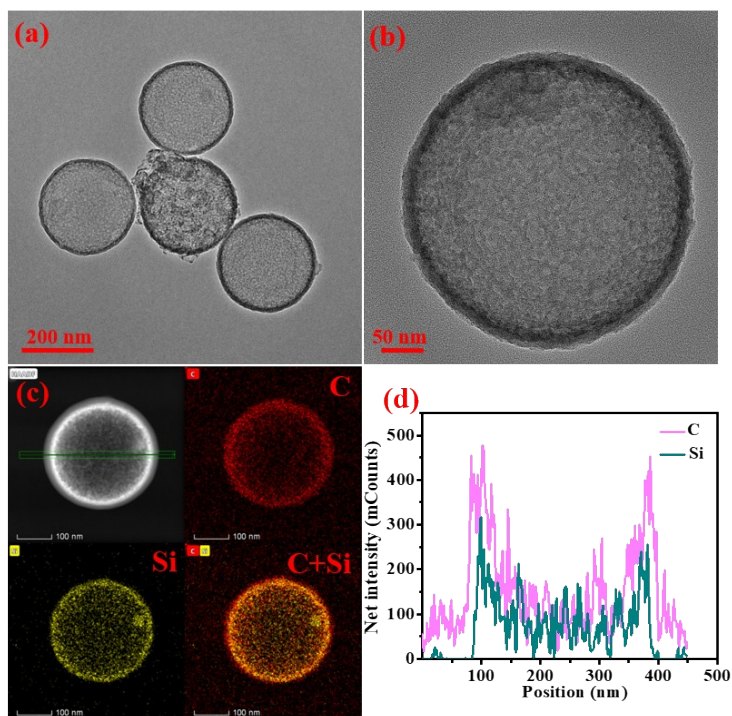

**Figure S4.** (a and b) TEM low and high magnification images (c) EDS elemental mapping images of carbon, silicon and overlap. (d) EDX line scan image of SiNDs@SSHC.

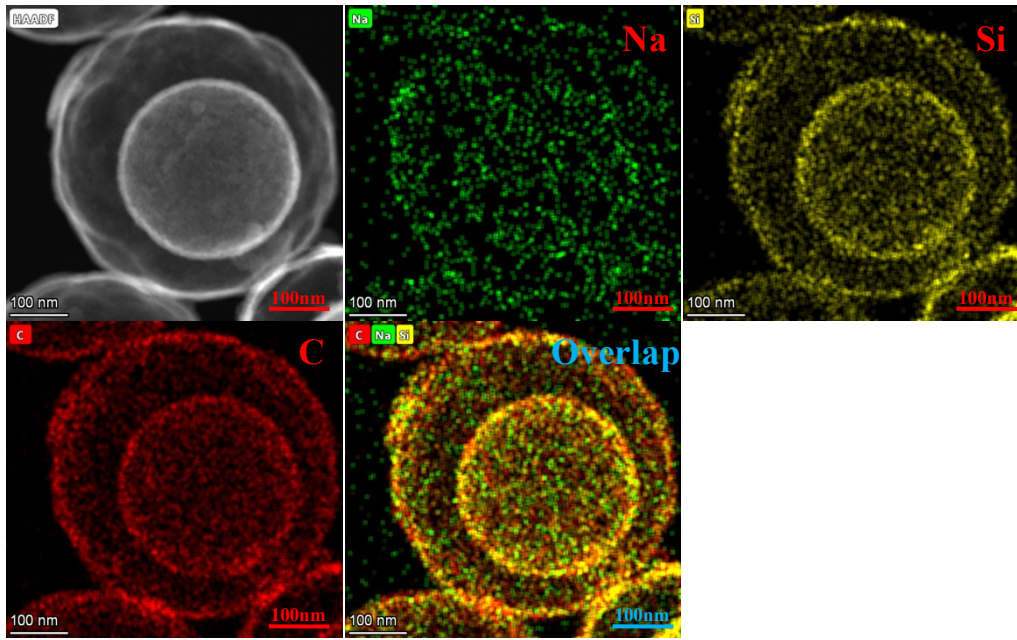

**Figure S5.** EDX elemental mapping images of sodium, silicon, carbon and overlap of SiNDs@DSHC soaked in  $\text{NaPF}_6$  for 24 h.



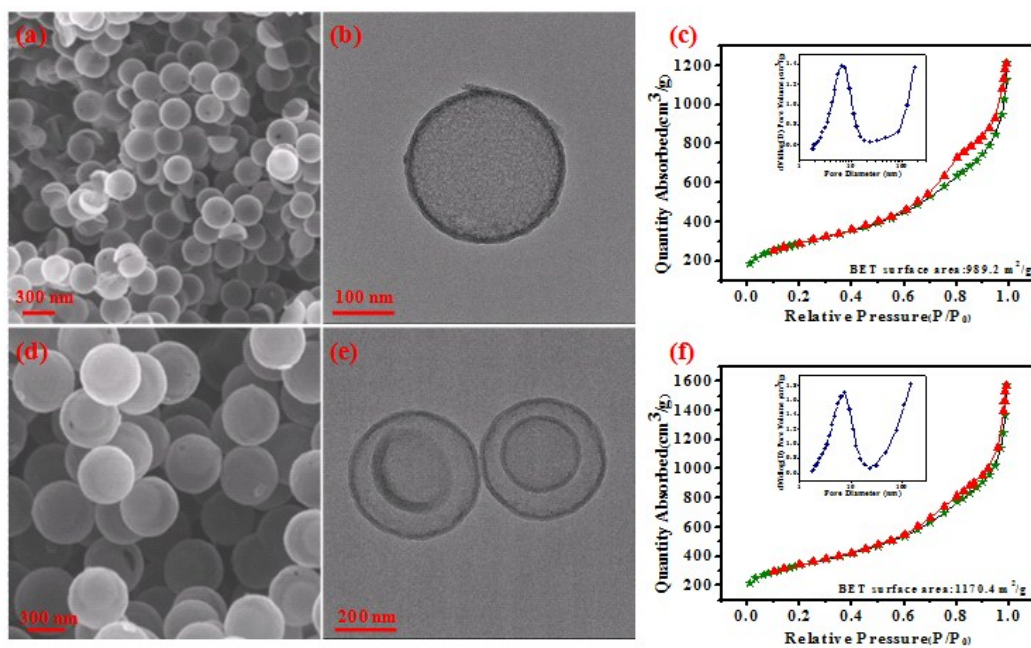

**Figure S6.** (a) SEM (b) TEM (c) Nitrogen adsorption/ desorption isotherm and the inset shows BJH pore size distribution of SSHC. (d) SEM (e) TEM (f) Nitrogen adsorption/ desorption isotherm and the inset shows BJH pore size distribution of DSHC.

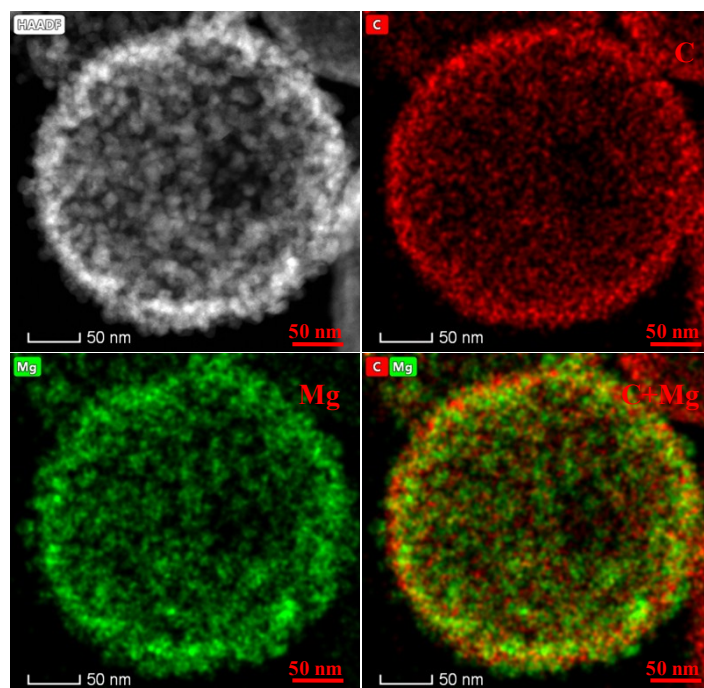

**Figure S7.** EDX elemental mapping images of carbon, silicon and overlap of calcining hollow carbon and Mg.



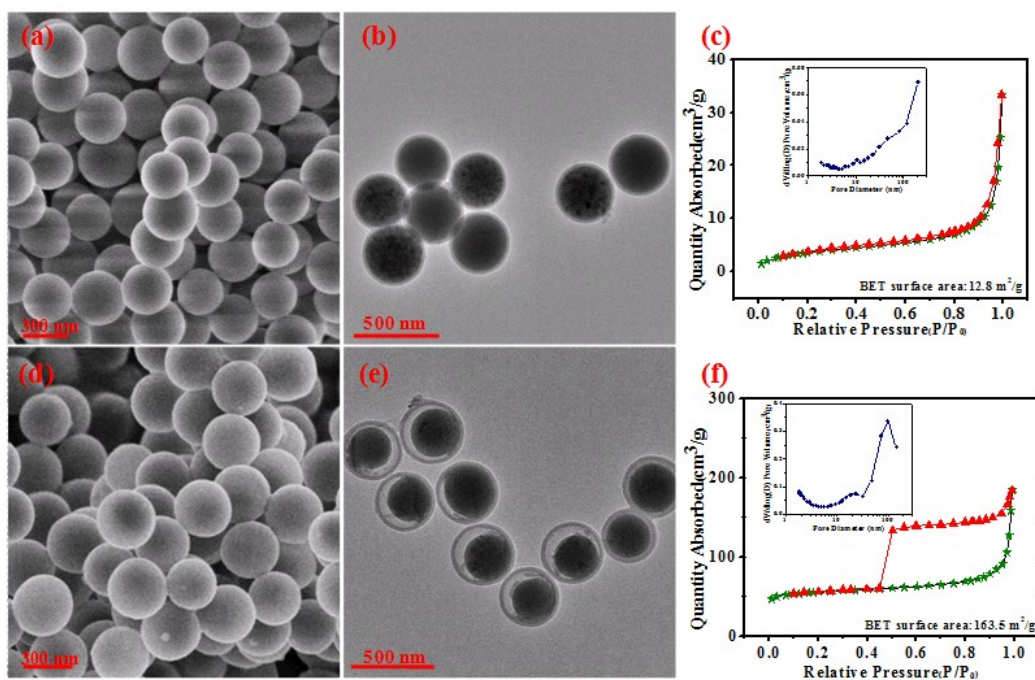

**Figure S8.** (a) SEM (b) TEM and (c) Nitrogen adsorption/ desorption isotherm and the inset shows BJH pore size distribution of SiO<sub>2</sub>@C. (d) SEM (e) TEM and (f) Nitrogen adsorption/ desorption isotherm and the inset shows BJH pore size distribution of etched SiO<sub>2</sub>@C.

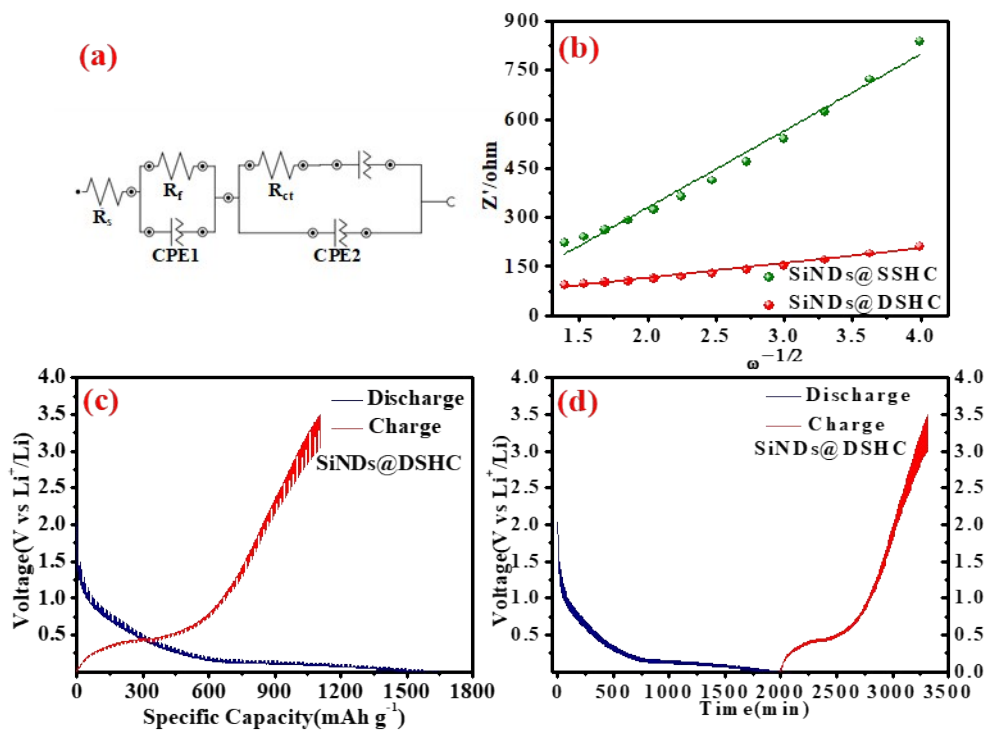

**Figure S9.** (a) The equivalent circuit. (b) Relationship between  $Z'$  and  $\omega^{-1/2}$  in the low-frequency region. (c and d) GITT curves of SiND<sub>s</sub>@DSHC.

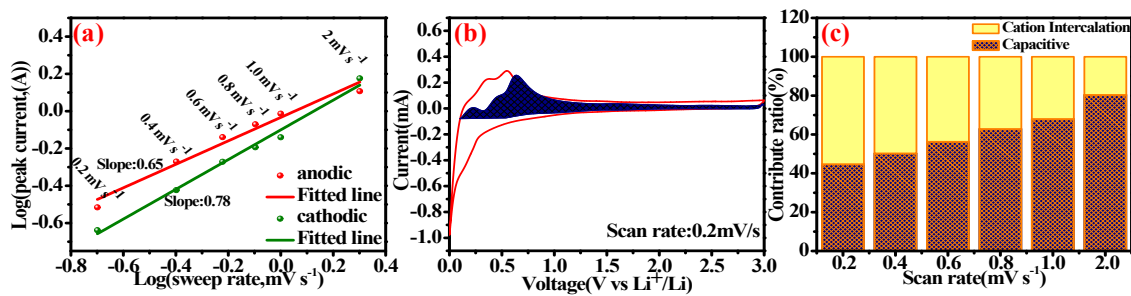

**Figure S10.** (a) Corresponding log  $i$  versus log  $v$  plots at each redox peak (peak current:  $i$ , scan rate:  $v$ ) and (b) CV curve with the capacitance control shown by the shaded region at a scan rate of  $0.2 \text{ mV s}^{-1}$  (c) bar chart showing the percent of capacitance control at different scan rates of SiNDs@DSHC.

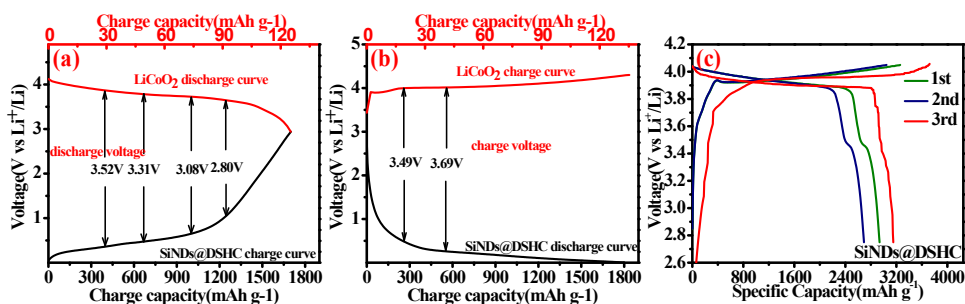

**Figure S11.** (a) Second discharge (LiCoO<sub>2</sub> electrode in the half battery, upper portion) and charge (SiNDs@DSHC composite in the half battery, lower portion) curves. (b) Second charge (LiCoO<sub>2</sub> electrode in the half battery, upper portion) and discharge (SiNDs@DSHC composite in the half battery, lower portion) curves. (c) Charge-discharge profiles of SiNDs@DSHC as anode materials in full cells.

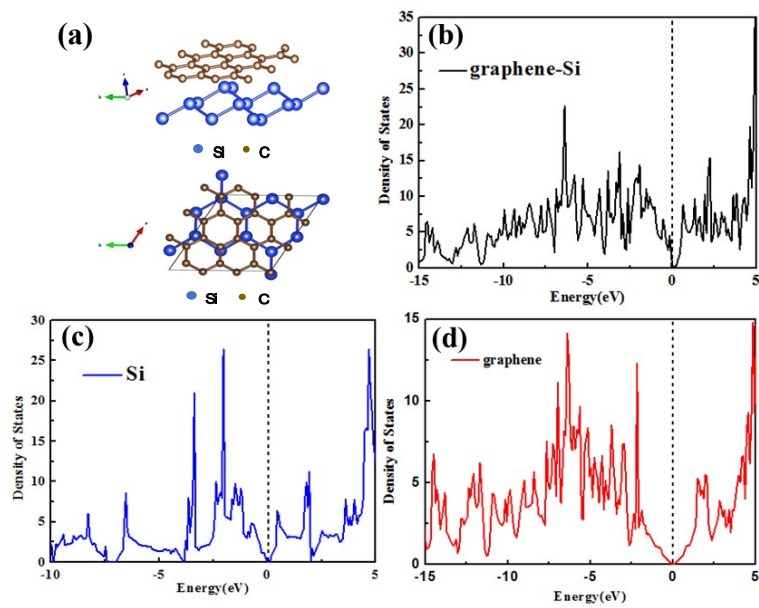

**Figure S12.** (a) The side view and top view of the interface between single graphene layer and silicon (111) plane, (b) the density of state (DOS) of the heterostructure C/Si, (c) DOSs of individual silicon and (d) graphene.

**Table S1.** Fitted electrochemical impedance parameters.

| <b>Sample</b>                           | <b><math>R_s</math>/Ohm</b> | <b><math>R_f</math>/Ohm</b> | <b><math>R_{ct}</math>/Ohm</b> |
|-----------------------------------------|-----------------------------|-----------------------------|--------------------------------|
| <b>SiNDs@SSHC</b>                       | <b>7.7</b>                  | <b>74.3</b>                 | <b>265.0</b>                   |
| <b>SiNDs@DSHC</b>                       | <b>7.3</b>                  | <b>44.7</b>                 | <b>30.5</b>                    |
| <b>SiNDs@DSHC<br/>after 1000 cycles</b> | <b>4.6</b>                  | <b>17.8</b>                 | <b>56.3</b>                    |
